# Supplementary material for: Retracted Article: Iso-pencillixanthone A from a marine-derived fungus reverses multidrug resistance in cervical cancer cells through down-regulating P-gp and re-activating apoptosis
Source: Royal Society of Chemistry journal article supplement (doi:10.1039/c8ra09506j), 2018-01-01
Supplement: c8ra09506j1.pdf [file c8ra09506j1.pdf]

## Electronic Supplementary Information

### **iso-pencillixanthone A from a marine-derived fungus reverses multidrug resistance in cervical cancer cells through down-regulating P-gp and re-activating apoptosis**

Li Chen,<sup>a</sup> Xinxin Li,<sup>a</sup> Miaomiao Cheng,<sup>a</sup> Siyuan Wang,<sup>a</sup> Qihong Zheng\*<sup>b</sup> and  
Qinying Liu\*<sup>b</sup>

<sup>a</sup>Institute of Biomedical and Pharmaceutical Technology, Fuzhou University, Fuzhou  
350002, P. R. China

<sup>b</sup>Fujian Provincial Key Laboratory of Tumor Biotherapy, Fujian Cancer Hospital &  
Fujian Medical University Cancer Hospital, Fuzhou 350014, P. R. China. E-mails:  
zqh2858@foxmail.com; liuqy@fjmu.edu.cn; Tel.: +86-591-8366-0063

## Table of Content

**Figure S1.** HR-(+) ESI-MS Spectrum of iso-PXA.

**Figure S2.**  $^1\text{H}$  NMR (500 MHz,  $\text{DMSO-}d_6$ ) spectrum of iso-PXA.

**Figure S3.**  $^{13}\text{C}$  NMR (125 MHz,  $\text{DMSO-}d_6$ ) spectrum of iso-PXA.

**Figure S4.** DEPT 135° Spectrum of iso-PXA (in  $\text{DMSO-}d_6$ ).

**Figure S5.**  $^1\text{H-}^1\text{H}$  COSY Spectrum of iso-PXA (in  $\text{DMSO-}d_6$ ).

**Figure S6.** HMQC Spectrum of iso-PXA (in  $\text{DMSO-}d_6$ ).

**Figure S7.** HMBC Spectrum of iso-PXA (in  $\text{DMSO-}d_6$ ).

**Figure S8.** The progress chart of extraction and purification for iso-PXA.

**Figure S9.** Cytotoxicity of iso-PXA and DDP on HeLa/DDP and HeLa cells was determined by WST-1 assay.

**Table S1.** 500 MHz  $^1\text{H}$  and 125 MHz  $^{13}\text{C}$  NMR Data for iso-PXA (in  $\text{DMSO-}d_6$ ).

**Table S2.** Inhibitory activity of iso-PXA against cancer cell lines for 48 h.

**Table S3.** The cytotoxicity of drugs to the corresponding resistant cell lines for 48 h.

**Table S4.** Inhibition effect of iso-PXA on tumor growth of HeLa/VCR xenograft model.

**Table S5.** Primers for the genes used in RT-qPCR test.

**Detailed Experimental Methods.**

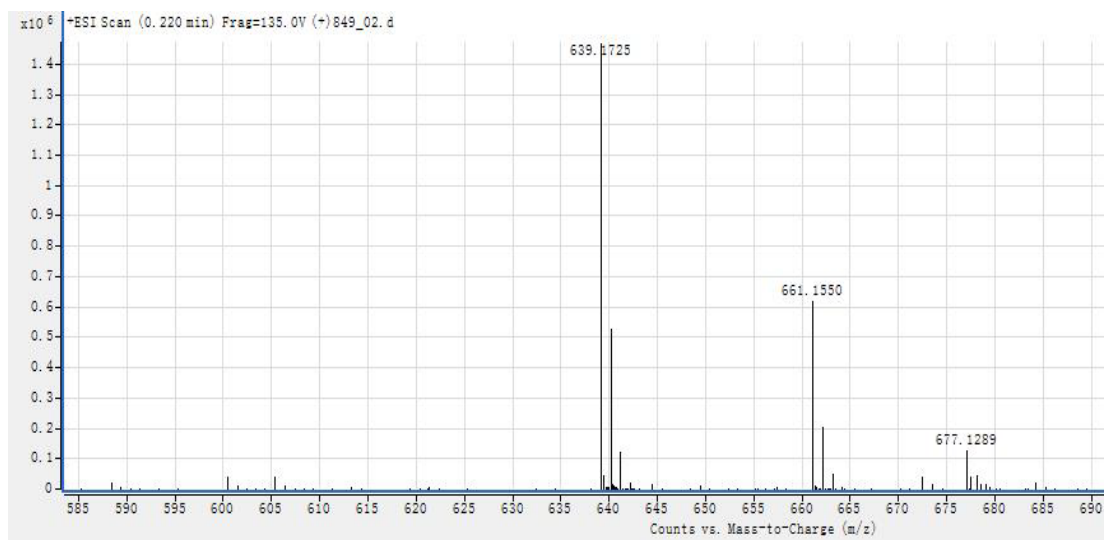

**Figure S1.** HR-(+) ESI-MS Spectrum of iso-PXA.

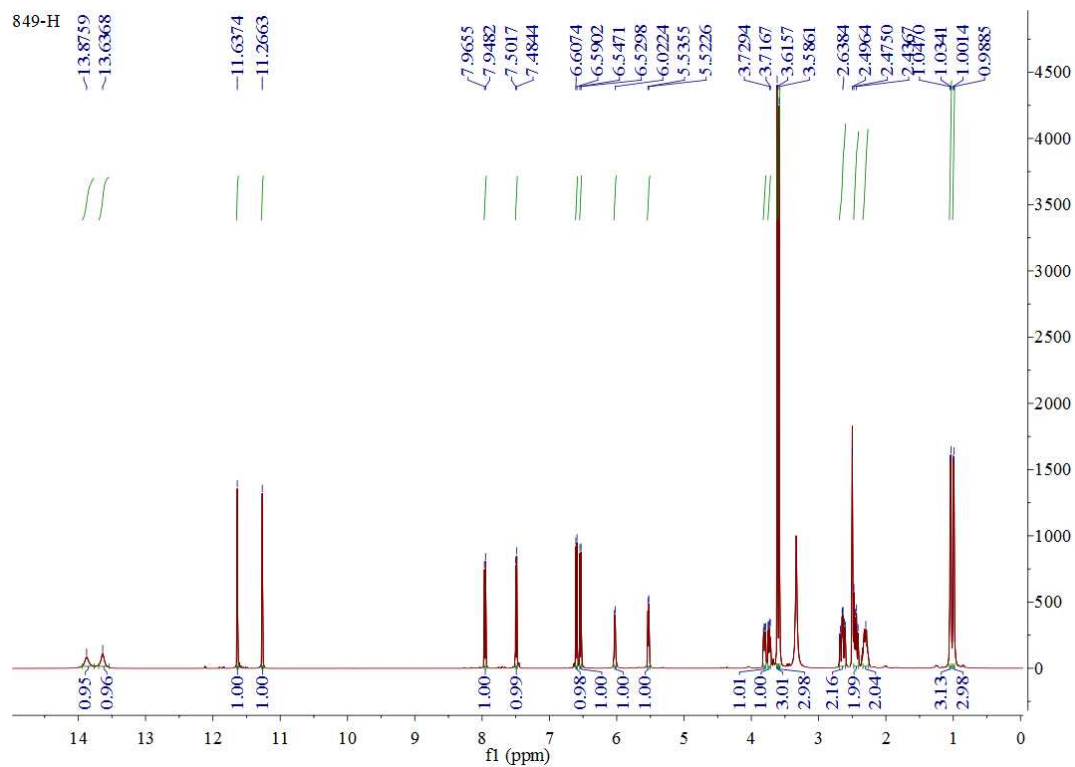

**Figure S2.**  $^1\text{H}$  NMR (500 MHz,  $\text{DMSO-}d_6$ ) spectrum of iso-PXA.

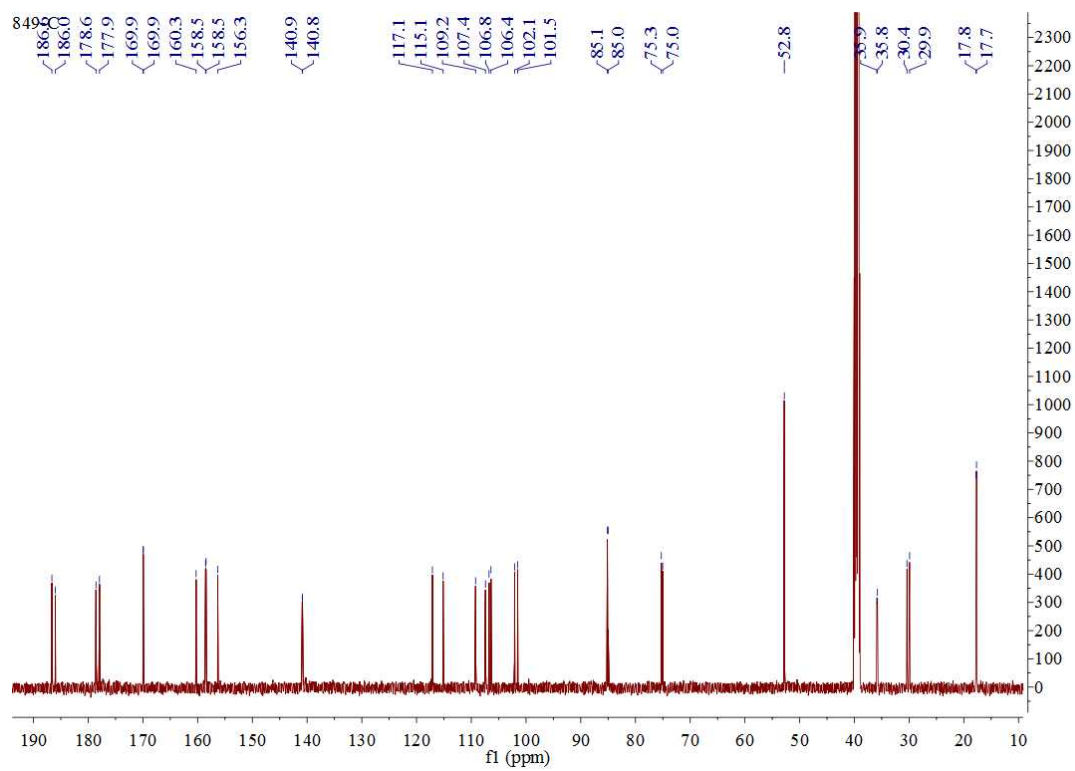

**Figure S3.**  $^{13}\text{C}$  NMR (125 MHz,  $\text{DMSO-}d_6$ ) spectrum of iso-PXA.

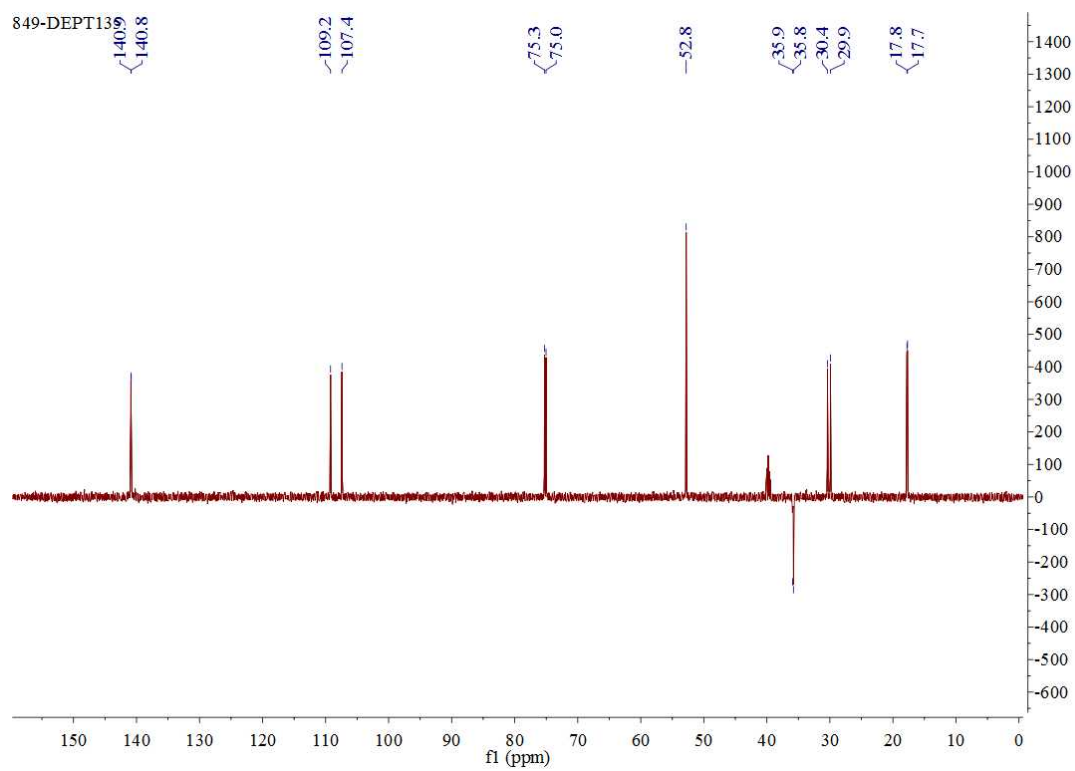

**Figure S4.** DEPT 135° Spectrum of iso-PXA (in DMSO- $d_6$ ).

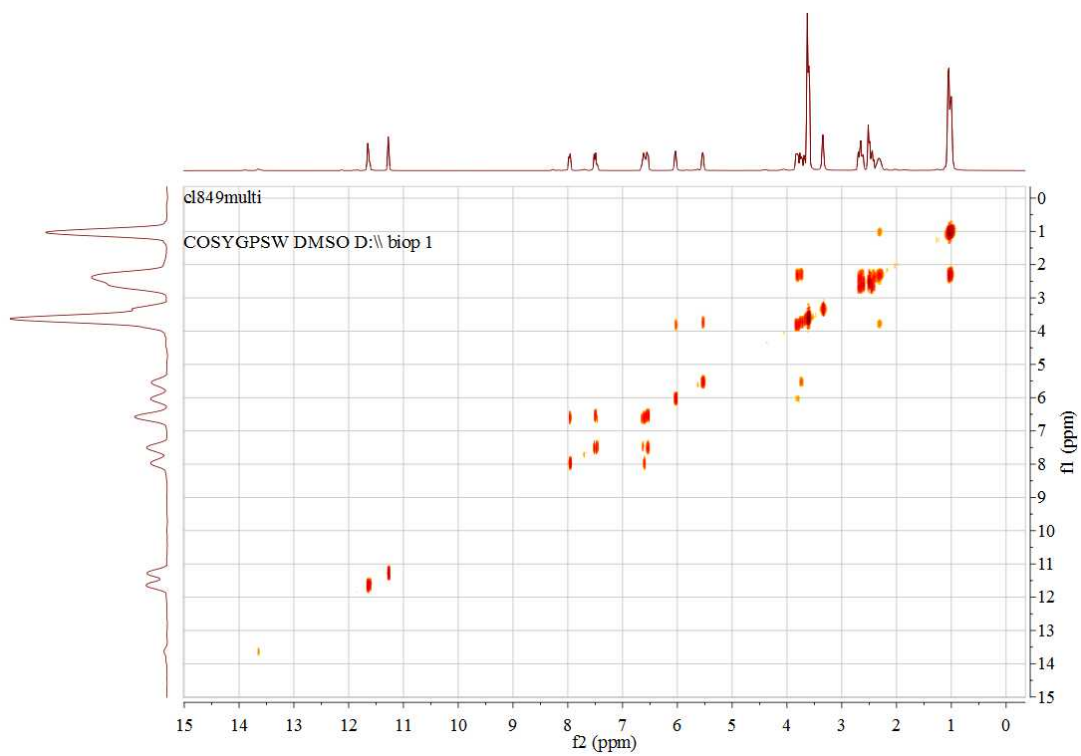

**Figure S5.**  $^1\text{H}$ - $^1\text{H}$  COSY Spectrum of iso-PXA (in  $\text{DMSO-}d_6$ ).

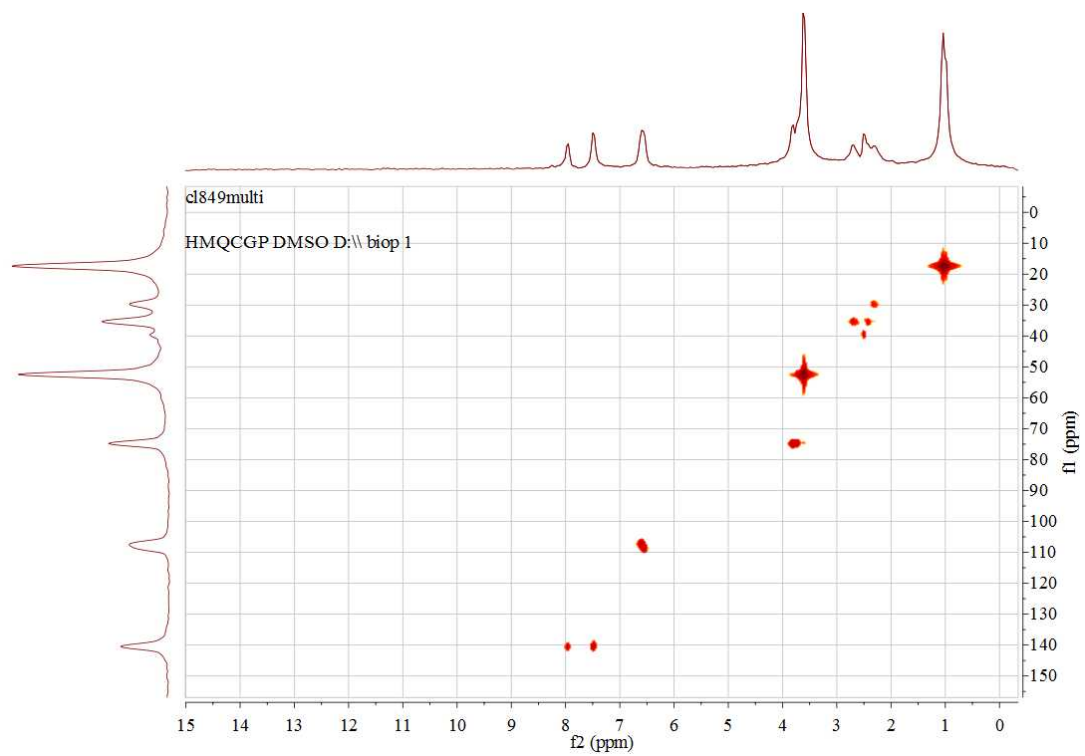

**Figure S6.** HMQC Spectrum of iso-PXA (in DMSO- $d_6$ ).



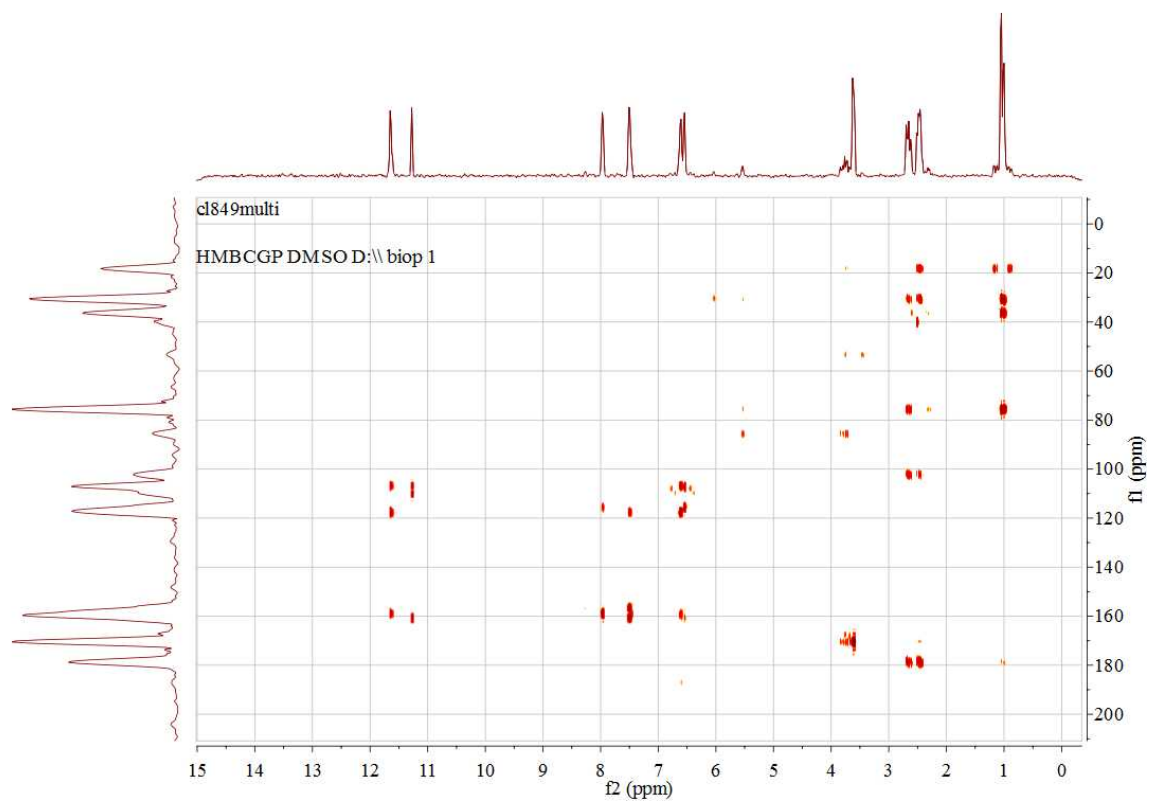

**Figure S7.** HMBC Spectrum of iso-PXA (in DMSO- $d_6$ ).

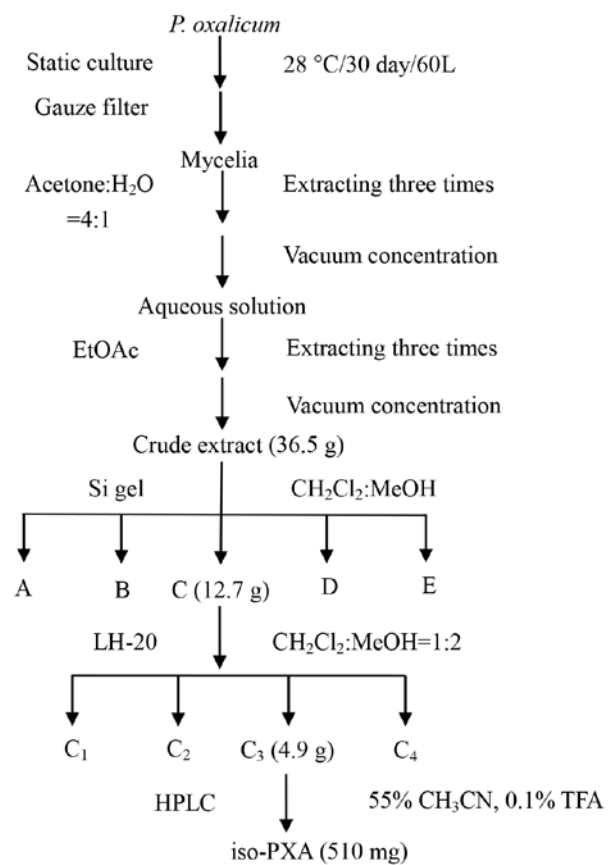

**Figure S8.** The progress chart of extraction and purification for iso-PXA.

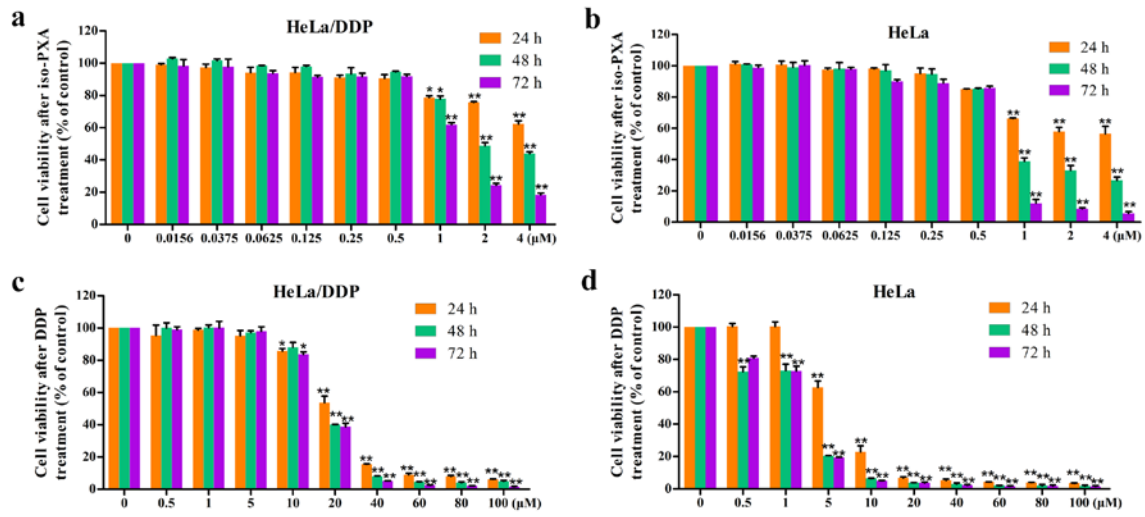

**Figure S9.** Cytotoxicity of iso-PXA and DDP on HeLa/DDP and HeLa cells was determined by WST-1 assay. a. Cytotoxicity of iso-PXA on HeLa/DDP cells. b. Cytotoxicity of iso-PXA on HeLa cells. c. Cytotoxicity of DDP on HeLa/DDP cells. d. Cytotoxicity of DDP on HeLa cells. Data are the means  $\pm$  SD of at least three independent experiments.

**Table S1** 500 MHz  $^1\text{H}$  and 125 MHz  $^{13}\text{C}$  NMR Data for iso-PXA (in  $\text{DMSO-}d_6$ )

| NO.  | $\delta_{\text{C}}$ | $\delta_{\text{H}}$ ( <i>J</i> in Hz)                    | NO.   | $\delta_{\text{C}}$ | $\delta_{\text{H}}$ ( <i>J</i> in Hz)                     |
|------|---------------------|----------------------------------------------------------|-------|---------------------|-----------------------------------------------------------|
| 1    | 158.5 s             |                                                          | 1'    | 160.3 s             |                                                           |
| 2    | 117.1 s             |                                                          | 2'    | 109.2 d             | 6.54 (1H, d, 8.7)                                         |
| 3    | 140.9 d             | 7.96 (1H, d, 8.7)                                        | 3'    | 140.8 d             | 7.49 (1H, d, 8.7)                                         |
| 4    | 107.4 d             | 6.60 (1H, d, 8.7)                                        | 4'    | 115.1 s             |                                                           |
| 4a   | 158.5 s             |                                                          | 4a'   | 156.3 s             |                                                           |
| 5    | 75.3 d              | 3.80 (1H, dd, 11.0, 5.5)                                 | 5'    | 75.0 d              | 3.73 (1H, dd, 11.0, 6.5)                                  |
| 6    | 30.4 d              | 2.30 (1H, m)                                             | 6'    | 29.9 d              | 2.30 (1H, m)                                              |
| 7    | 35.9 t              | a 2.66 (1H, dd, 19.1, 6.2)<br>b 2.48 (1H, dd, 19.1, 5.9) | 7'    | 35.8 t              | a 2.63 (1H, dd, 19.1, 8.2)<br>b 2.44 (1H, dd, 19.1, 11.5) |
| 8    | 177.9 s             |                                                          | 8'    | 178.6 s             |                                                           |
| 8a   | 101.5 s             |                                                          | 8a'   | 102.1 s             |                                                           |
| 9    | 186.6 s             |                                                          | 9'    | 186.0 s             |                                                           |
| 9a   | 106.4 s             |                                                          | 9a'   | 106.8 s             |                                                           |
| 10a  | 85.1 s              |                                                          | 10a'  | 85.0 s              |                                                           |
| 11   | 17.8 q              | 1.04 (3H, d, 6.5)                                        | 11'   | 17.7 q              | 0.99 (3H, d, 6.5)                                         |
| 12   | 169.9 s             |                                                          | 12'   | 169.9 s             |                                                           |
| 13   | 52.8 q              | 3.59 (3H, s)                                             | 13'   | 52.8 q              | 3.62 (3H, s)                                              |
| OH-1 |                     | 11.64 (1H, s)                                            | OH-1' |                     | 11.27 (1H, s)                                             |
| OH-5 |                     | 6.03 (1H, d, 5.5)                                        | OH-5' |                     | 5.53 (1H, d, 6.5)                                         |
| OH-8 |                     | 13.64 (1H, s)                                            | OH-8' |                     | 13.88 (1H, s)                                             |

**Table S2** Inhibitory activity of iso-PXA against cancer cell lines for 48 h

| Cell line  | IC <sub>50</sub> (μM) | Cell line | IC <sub>50</sub> (μM) |
|------------|-----------------------|-----------|-----------------------|
| PLC/PRF/5  | 0.807 ± 0.038         | A375      | 1.500 ± 0.002         |
| Huh-7      | 1.110 ± 0.136         | SW620     | 0.781 ± 0.043         |
| SK-Hep-1   | 0.905 ± 0.034         | SW480     | 1.573 ± 0.078         |
| SPC-A1     | 0.979 ± 0.026         | LOVO      | 2.096 ± 0.148         |
| SK-MES-1   | 1.472 ± 0.063         | CNE1      | 1.142 ± 0.055         |
| 95D        | 1.388 ± 0.069         | CNE2      | 1.518 ± 0.075         |
| U937       | 1.325 ± 0.002         | BGC-823   | 1.455 ± 0.054         |
| MDA-MB-231 | 1.995 ± 0.029         | SGC-7901  | 1.200 ± 0.094         |
| Raji       | 1.588 ± 0.070         | HGC-27    | 1.358 ± 0.035         |
| Jeko-1     | 1.067 ± 0.001         | HFF-1     | 26.73 ± 1.002         |
| KYSE450    | 1.186 ± 0.080         | LO2       | 8.238 ± 0.158         |
| EC9706     | 0.862 ± 0.045         |           |                       |

Data are the means ± SD of at least three independent experiments.

**Table S3** The cytotoxicity of drugs to the corresponding resistant cell lines for 48 h

| Drugs | Cell Line | IC <sub>50</sub> (μM) | Drugs   | Cell Line | IC <sub>50</sub> (μM) |
|-------|-----------|-----------------------|---------|-----------|-----------------------|
| VCR   | HeLa      | 0.013 ± 0.003         | iso-PXA | HeLa      | 0.409 ± 0.019         |
|       | HeLa/VCR  | 1.199 ± 0.021         |         | HeLa/VCR  | 0.341 ± 0.005         |
| DDP   | HeLa      | 1.805 ± 0.060         | iso-PXA | HeLa      | 1.145 ± 0.017         |
|       | HeLa/DDP  | 17.77 ± 0.317         |         | HeLa/DDP  | 2.633 ± 0.069         |
| DDP   | A549      | 26.18 ± 1.520         | iso-PXA | A549      | 1.019 ± 0.008         |
|       | A549/DDP  | 82.81 ± 1.718         |         | A549/DDP  | 0.924 ± 0.081         |
| ADM   | K562      | 0.216 ± 0.042         | iso-PXA | K562      | 9.464 ± 0.049         |
|       | K562/A02  | 33.21 ± 1.203         |         | K562/A02  | 3.605 ± 0.066         |
| ADR   | MCF-7     | 0.294 ± 0.023         | iso-PXA | MCF-7     | 2.493 ± 0.070         |
|       | MCF-7/ADR | 3.680 ± 0.197         |         | MCF-7/ADR | 3.325 ± 0.014         |

Data are the means ± SD of at least three independent experiments.

**Table S4** Inhibition effect of iso-PXA on tumor growth of HeLa/VCR xenograft model

| Group | Drug    | Concentration (mpk) | Mice member (initial/end) | Body weight (initial/end) | Tumor weight (g)         | Inhibition rate (%)    |
|-------|---------|---------------------|---------------------------|---------------------------|--------------------------|------------------------|
|       |         | 0                   | 5                         | 5                         | 19.2 ± 0.1    22.7 ± 0.6 | 3.971±0.17    --       |
|       |         | 2.5                 | 5                         | 5                         | 19.0 ± 0.2    21.1 ± 0.9 | 1.796±0.29**    54.7%  |
| 5     | Iso-PXA | 5                   | 5                         | 5                         | 18.9 ± 0.3    21.6 ± 0.8 | 0.880±0.19***    77.8% |
|       |         | 10                  | 5                         | 5                         | 19.1 ± 0.2    21.4 ± 0.7 | 0.435±0.29***    89.1% |
|       | VCR     | 2.5                 | 5                         | 5                         | 18.9 ± 0.3    22.9 ± 0.7 | 2.465±0.16*    37.9%   |

The experiment was carried out using nude mice implanted subcutaneously (sc) with HeLa/VCR ( $1.2 \times 10^7/0.1$  ml) cells under the left hind legs. Animals were randomized into five groups including control, three desired dosages of iso-PXA and VCR, i. g, q. d.  $\times 15$ . At the end of the experiment, body weight, tumor weight and tumor volume were recorded. Data are means  $\pm$  SD of the tumor weight for each group of 5 experimental animals. \*P < 0.05, \*\*P < 0.01, \*\*\*P < 0.001 v.s. control group.

**Table S5** Primers for the genes used in RT-qPCR test

| <b>Gene</b> |         | <b>Sequences</b>                  |
|-------------|---------|-----------------------------------|
| PARP        | forward | 5'- GGGATGGTCAGTGTTGATGGA -3'     |
|             | reverse | 5'- GCTATCGTGGTGGCAAACAATA -3'    |
| CyclinB1    | forward | 5'- GTACCATGGCGCTCAGGGTCAC -3'    |
|             | reverse | 5'- CTAGATTATGCTTTTGTACACGGC -3'  |
| caspase-3   | forward | 5'- GAAATTGTGGAATTGATGCGTGA -3'   |
|             | reverse | 5'- CTACAACGATCCCCTCTGAAAAA -3'   |
| caspase-8   | forward | 5'- TGTTGGAGGAAAGCAATCTG -3'      |
|             | reverse | 5'- CCTGGTGTCTGAAGTTCCT -3'       |
| caspase-9   | forward | 5'- CTCAGACCAGAGATTTCGCAAAC -3'   |
|             | reverse | 5'- GCATTTCCCCTCAAACCTCTCAA -3'   |
| Bcl-2       | forward | 5'- CGACTTTGCAGAGATGTCCA -3'      |
|             | reverse | 5'- ATGCCGGTTCAGGTAICTAG -3'      |
| Bax         | forward | 5'- CCTTTTCTACTTTGCCAGCAAAC -3'   |
|             | reverse | 5'- GAGGCCGTCCCAACCAC -3'         |
| P-gp        | forward | 5'- GGGATGGTCAGTGTTGATGGA -3'     |
|             | reverse | 5'- GCTATCGTGGTGGCAAACAATA -3'    |
| Survivin    | forward | 5'- CGCGGGACCCGTTGGCAGAG -3'      |
|             | reverse | 5'- GGAATTCGGCAGCTCCGGCCAGAGG -3' |
| FBW7        | forward | 5'- CGACGCCGAATTACATCTGTC -3'     |
|             | reverse | 5'- CGTTGAAACTGGGGTTCTATCA -3'    |
| Mcl-1       | forward | 5'- GTGCCTTTGTGGCTAAACACT -3'     |
|             | reverse | 5'- AGTCCCGTTTTGTCCTTACGA -3'     |
| MAPK        | forward | 5'- TACACCAACCTCTCGTACATCG -3'    |
|             | reverse | 5'- CATGTCTGAAGCGCAGTAAGATT -3'   |
| PTEN        | forward | 5'- TTTGAAGACCATAACCCACCAC -3'    |
|             | reverse | 5'- ATTACACCAGTTCGTCCCTTTC -3'    |
| EGFR        | forward | 5'- TTGCCGCAAAGTGTGTAACG -3'      |
|             | reverse | 5'- GTCACCCCTAAATGCCACCG -3'      |
| β-catein    | forward | 5'- CATCTACACACTTTGATGCTGCT -3'   |
|             | reverse | 5'- GCAGTTTTGTGTCAGTTCAGGGA -3'   |
| JNK         | forward | 5'- TGTGTGGAATCAAGCACCTTC -3'     |
|             | reverse | 5'- AGGCGTCATCATAAAACTCGTTC -3'   |
| SAPK        | forward | 5'- GAAACTAAGCCGTCCTTTTCAGA -3'   |
|             | reverse | 5'- TCCAGCTCCATGTGAATAACCT -3'    |
| GAPDH       | forward | 5'-GAAGGTGAAGGTCGGAGTC-3'         |
|             | reverse | 5'-GAAGATGGTGATGGGATTTC-3'        |



## Detailed Experimental Methods

### Reagents

iso-PXA (purity > 98%) was isolated from the metabolites of marine-derived *P. oxalicum*. Paclitaxel (PTX), doxorubicin (DOX), vincristine (VCR), cisplatin (DDP), adriamycin (ADR), nocodazole, verapamil (VRP), propidium iodide (PI), acridine orange (AO), ethidium bromide (EB) and rhodamine123 (Rh123) were purchased from Sigma Chemical (St. Louis, MO, USA). Paraformaldehyde (PFA) and WST-1 were purchased from Roche (Roche, Indianapolis, USA). Primary antibodies against P-gp, PARP, cyclin B1, caspase-3, caspase-8, caspase-9, Bax, Bcl-2, Mcl-1 and  $\beta$ -actin were supplied by Cell Signaling Technology (Danvers, MA, USA). Primary antibodies against Bid and cytochrome c were supplied by Abcam (Cambridge, MA, USA). FBXW7/Cdc4 antibody was purchased from R&D Systems (Minneapolis, MN, USA). The primary antibody against Cofilin and the HRP-conjugated secondary antibodies against rabbit and mouse were obtained from BOSTER Biological Technology Co., Ltd. (Wuhan, China). All reagent water used was pretreated with a Milli-Q apparatus (Millipore Corporation, Darmstadt, Germany). Other chemicals were purchased from Aladdin (Shanghai, China). All chemicals except iso-PXA were of the highest purity commercially available.

### Culture of Cell Lines

All of the human sensitive cancer cell lines were purchased from Shanghai Cell Resource Center (Shanghai, China). The K562, K562/AO2 and HeLa/VCR cell lines were a generous gift from the Fujian Medical University. The resistant cell lines

(MCF-7/ADR and A549/DDP) were purchased from BoGu Biotech Co., Ltd. (Shanghai, China). HeLa/DDP was purchased from Fenghui Biotech Co., Ltd. (Hunan, China). All of the cell lines were cultured in DMEM or RPMI1640 (HyClone, USA) with 10% fetal bovine serum (GEMINI, China), penicillin (100 U/ml) and streptomycin (100 µg/mL) at 37 °C in a 5% (v/v) CO<sub>2</sub> humidified atmosphere.

### **Cytotoxicity Assay**

Cell viability was assessed by the WST-1 cell proliferation assay kit (Roche, Indianapolis, IN, USA). Briefly, 100 µl of cell suspension were cultured in 96-well plate and treated with gradient concentrations of iso-PXA. After 48 h, one-tenth volume of WST-1 solution was added. After cells were incubated at 37 °C for 4 h, the absorbance at 450 nm was measured. The cell proliferation inhibition of 50% (IC<sub>50</sub>) was analyzed by GraphPad Prism 5.0 software. The resistant index (RI) was calculated by the ratio of the IC<sub>50</sub> of the resistant cells to that of parental cells.

### **Real-time Cell Proliferation Assay Analysis**

Cell proliferation was determined using the DP version of the xCELLigence real-time cell analyzer (RTCA) (ACEA, San Diego, CA, USA), which recorded changes in impedance (reported as a cell index (CI)) over a prolonged time course in a noninvasive system. Briefly, the background impedance of RTCA DP E-Plates 16 (ACEA, San Diego, USA) was performed using the standard protocol provided in the software with 50 µL of media.  $5 \times 10^3$  cells were seeded with 100 µL of RPMI-1640 and left to equilibrate at room temperature for 30 min. Cells were allowed to grow for 24 h before adding iso-PXA to the cultures at the indicated concentrations in duplicate.

The cell index (CI) data of the proliferating cells were recorded and expressed as mean of CI normalized to the CI recorded at the time of cells treatment compared to untreated cells.

### **Cell Cycle Analysis**

The cell cycle assays were performed by flow cytometry (Beckman Coulter FC500, Brea, CA, USA). Briefly, cells were incubated with gradient concentrations of iso-PXA (0, 0.25, 0.5 and 1  $\mu$ M) and VCR (1  $\mu$ M) for 24 h and then collected, fixed and permeabilized with cold 70 % (v/v) ethanol at 4 °C overnight. After being washed with cold PBS, cells were resuspended in 1.0 mL stained solution containing 100  $\mu$ g/mL of DNase-free RNase A and 50  $\mu$ g/mL of propidium iodide and then measured by flow cytometry (Beckman Coulter FC500, Brea, CA, USA) to analyze cell cycle. A minimum of 10,000 events were analyzed in each experiment.

### **Western Blotting Analysis**

Cells ( $1 \times 10^6$  cells/well) were pre-incubated with iso-PXA for 24 h. Whole cells were then collected and suspended in lysis buffer (Boster Biological Technology Co., Ltd., Wuhan, China). Equal amounts of protein were separated by SDS-PAGE and transferred to an NC membrane (Bio-Rad, Richmond, CA, USA). The membrane was blocked with 5% skim milk-PBST and was then incubated overnight with primary antibodies (Primary antibodies against P-gp, PARP, cyclin B1, caspase-3, caspase-8, caspase-9, Bax, Bcl-2, Mcl-1,  $\beta$ -actin and Cofilin were diluted in 1:1000, FBXW7/Cdc4 antibody was diluted in 1:500) overnight at 4 °C. The secondary antibodies were peroxidase-conjugated anti-rabbit or mouse IgG (1:5000 dilution).

The protein bands were detected by a FluorChem E digital darkroom system (Protein Simple, Santa Clara, USA). Densitometry analysis was performed using Ipwin 32 software.
